# Supplementary material for: Using participatory action research to reimagine community mental health services in Colombia: a mixed-method study protocol
Source: PubMed Central journal article supplement (PMC9772630; doi:10.1136/bmjopen-2022-069329), 2022-12-21
Supplement: bmjopen-2022-069329supp002.pdf [file bmjopen-2022-069329supp002.pdf]

ToC STARS-C Project

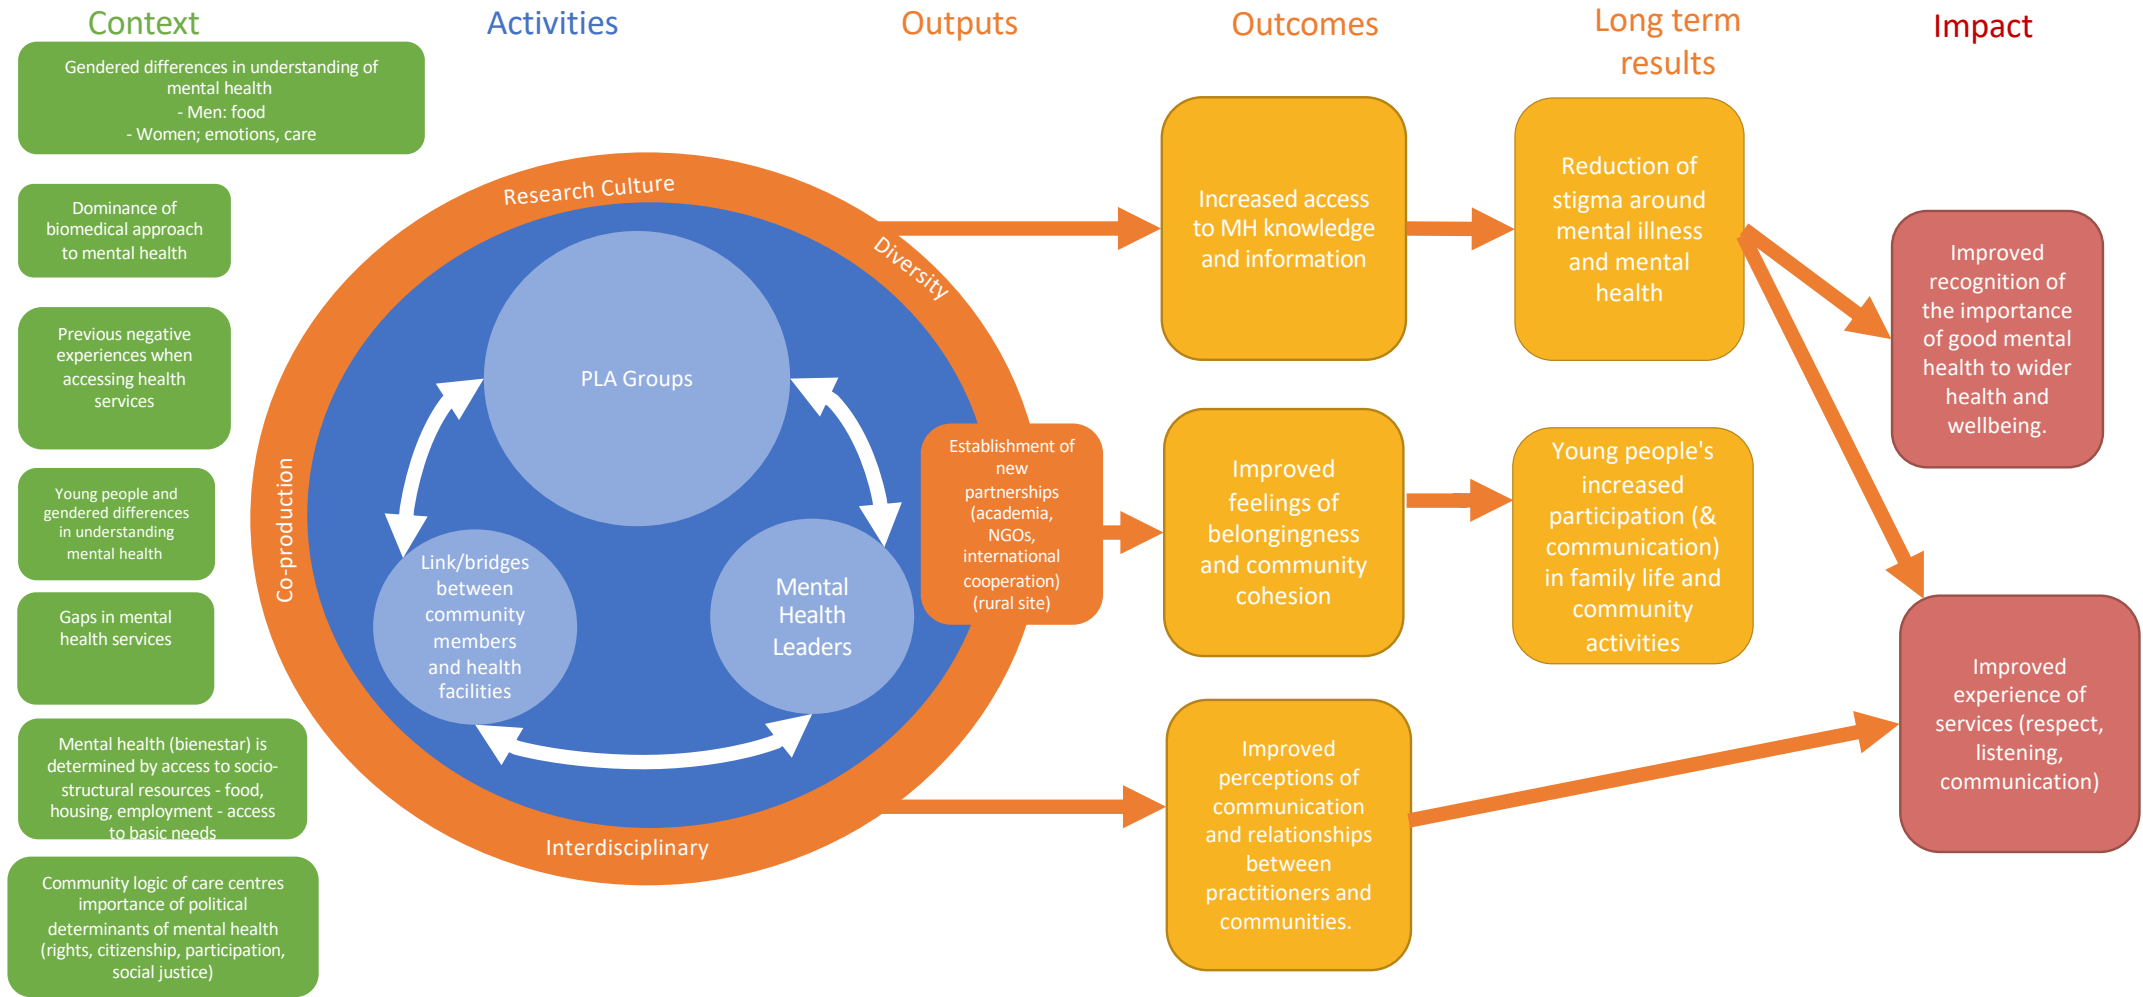

Potential indicators

- P 01: Greater acceptance of others seeking treatment
- P 01: More positive perceptions of mental illness
- P 01: Helping others to seek treatment
- P 01 y P 03: Increased willingness to seek treatment
- P 02: Increased feelings of community support
- P 02: Positive sense of self/identity
- P 02: Increased feelings of inclusion and acknowledgement in the community

- P 02: Increased sense of attachment to place/home
- P 02: percentage of people from the communities who attend community activities organised by the project
- P 02: Improved perception of individual and collective agency
- P 03: People feel recognised, listened to and acknowledged by health providers and systems
- P 03: Increased feelings of citizenship and that rights to quality care are being met

Assumptions

1. Health care providers are willing to attend community led forums, and provide guidance and contribute to community actions to improve mental health, including those informed by social determinants of health, human rights and traditional medicines
2. Local governments are willing to let community members have more ownership over the use of local spaces and environments (urban site)
3. Rural dwellers have reliable access to mental health practitioners and support
4. Young people have the resources and freedom to participate in mental health enhancing activities
